# Supplementary material for: Temperature-induced structural diversity of metal–organic frameworks and their applications in selective sensing of nitrobenzene and electrocatalyzing the oxygen evolution reaction
Source: Royal Society of Chemistry journal article supplement (doi:10.1039/c9ra07031a), 2019-01-01
Supplement: c9ra07031a1.pdf [file c9ra07031a1.pdf]

Supporting Information for

**Temperature-induced Structural Diversity of Metal-Organic Frameworks and  
Their Applications in Selectively Sensing of Nitrobenzene and Electrocatalyzing  
Oxygen Evolution Reaction**

Defang Han <sup>a</sup>, Kun Huang <sup>a,\*</sup>, Xianglin Li <sup>a</sup>, Mengni Peng <sup>a</sup>, Linhai Jing <sup>a</sup>, Baoyi Yu <sup>b</sup>, Zeqin Chen<sup>a</sup>,  
Dabin Qin <sup>a,\*</sup>

<sup>a</sup> *Key Laboratory of Chemical Synthesis and Pollution Control of Sichuan Province, School of Chemistry and Chemical Engineering, China West Normal University, Nanchong 637002, P. R. China.*

<sup>b</sup> *Key Laboratory of Urban Agriculture (North China), Ministry of Agriculture, College of Biological Sciences Engineering, Beijing University of Agriculture, Beijing 102206, P. R. China.*

<sup>c</sup> *College of Materials and Chemistry and Chemical Engineering, Chengdu University of Technology, Chengdu, 610059, P. R. China.*

\* *E-mails for corresponding authors: [hkun2017@cwnu.edu.cn](mailto:hkun2017@cwnu.edu.cn); [chenzeqin@sina.com](mailto:chenzeqin@sina.com); [qdbkyl@cwnu.edu.cn](mailto:qdbkyl@cwnu.edu.cn)*

## Contents

Electrocatalytic method for OER

**Scheme 1** Synthetic route for ligand **L1**

**Table S1** Comparisons of MOF-based sensors for NB

**Table S2** Selected bond lengths and angles for MOFs **1 - 4**

**Fig.S1** HRMS (ESI) spectrum of **L1**

**Fig.S2**  $^1\text{H}$  NMR spectrum of **L1**

**Fig.S3**  $^{13}\text{C}$  NMR spectrum of **L1**

**Fig.S4** FT-IR spectra of **1 - 4**

**Scheme 2** Coordination modes of dibenzobarrelene derived carboxylate in **1 - 4**

**Fig.S5** PXRD patterns for all samples

**Fig. S6** TG curves of MOFs **1 - 4**

**Fig.S7** Nitrogen sorption isotherms of samples **1 - 3**

**Fig S8** Fluorescence profiles of MOFs in different solvents

**Fig S9** Fluorescence profile of MOFs toward various NACs in water

**Fig.S10** Stern - Volmer curves of MOFs with NB

**Fig. S11** Reproducible quenching ability of MOFs

**Table S3** OER activities of some Co-based materials and MOFs

**Fig. S12** Electrochemical impedance spectra (EIS) of **1 - 4**

**Fig. S13** PXRD patterns of **1 - 4** immersed in 1M KOH for 2 h

## Electrocatalytic method for OER

Electrochemical measurements were carried out on a CHI-660E electrochemical workstation in a standard three electrode system with a scan rate of 5 mV s<sup>-1</sup> by using 1.0 M KOH (pH = 14) electrolyte, in which platinum wire was served as the counter electrode while Ag/AgCl was employed as the reference electrode. The Working electrode was prepared through loading the as-prepared samples onto the surface of the GCE, then electrochemically preconditioned with 10 cyclic voltam-metric scans to reach a steady state before LSV tests. All measured potentials were converted to the reversible hydrogen electrode (RHE) potential based on the equation  $E(\text{RHE}) = E(\text{Ag}/\text{AgCl}) + 0.059 \text{ pH} + 0.197 \text{ V}$ . Electrochemical impedance spectra (EIS) were recorded at the open circuit potential in potentiostatic mode in a frequency range from 100 kHz to 0.1 Hz with an AC amplitude of 5 mV. The charging current versus the scan rate was directly proportional to Cdl, and the electrochemical active surface area could be evaluated from the slope. All measurements were conducted at room temperature unless otherwise stated.

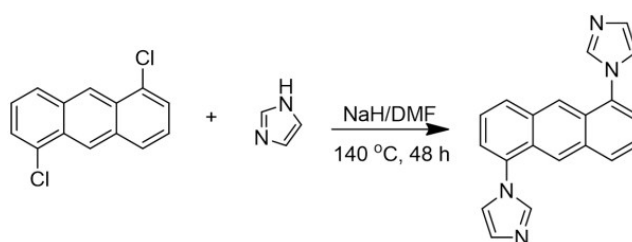

**Scheme S1** Synthetic route for ligand L1

**Table S1** Comparisons of some MOF-based sensors for NB among various NACs.

| MOFs                                                                                   | Medium           | $K_{sv}/M^{-1}$                           | $\lambda_{Ex}/nm$ | LOD                 | Refs                                               | Selectivity |
|----------------------------------------------------------------------------------------|------------------|-------------------------------------------|-------------------|---------------------|----------------------------------------------------|-------------|
| UPC-21                                                                                 | DMSO             | $4.42 \times 10^5$                        | 330               | 0.0949 ppm          | <i>Sci. Rep.</i> , 2016, <b>6</b> , 20672          | no          |
| $[\text{Tb}_2(\text{H}_2\text{L})_3(\text{H}_2\text{O})_2] \cdot 21\text{H}_2\text{O}$ | EtOH             | $2.5 \times 10^4$                         | 265               | 0.467 $\mu\text{M}$ | <i>J. Mater. Chem. A</i> , 2017, <b>5</b> , 1952   | no          |
| $\text{Tb}^{3+}@\text{NENU-522}$                                                       | DMF              | -                                         | 333               | 100 ppm             | <i>Inorg. Chem.</i> 2015, <b>54</b> , 3290         | no          |
| Zn-MOFs                                                                                | -                | <504.6                                    | 360               | -                   | <i>Cryst. Growth Des.</i> , 2016, <b>16</b> , 4539 | no          |
| Ln-MOFs                                                                                | H <sub>2</sub> O | $617/754 \times 10^{-2} \text{ ppm}^{-1}$ | 320               | -                   | <i>Dalton Trans.</i> 2015, <b>44</b> , 14594       | no          |
| $[\text{Zn}(\text{L})_2] \cdot 3\text{DMF} \cdot 5\text{H}_2\text{O}$                  | MeOH             | -                                         | -                 | -                   | <i>Inorg. Chem.</i> , 2013, <b>52</b> , 12323      | no          |

|                                                                                                                                           |                       |                                                      |                |               |                                                    |            |
|-------------------------------------------------------------------------------------------------------------------------------------------|-----------------------|------------------------------------------------------|----------------|---------------|----------------------------------------------------|------------|
| [InRu(dcbpy) <sub>3</sub> ]-<br>[(CH <sub>3</sub> ) <sub>2</sub> NH <sub>2</sub> ] <sub>3</sub> ·6H <sub>2</sub> O                        | MeOH                  | -                                                    | 400<br>(solid) | -             | <i>Cryst. Growth Des.</i> , 2013, <b>13</b> , 5466 | no         |
| Zn <sub>4</sub> O(L) <sub>2</sub> (H <sub>2</sub> O) <sub>3</sub><br>3DMA 3EtOH 6H <sub>2</sub> O                                         | EtOH                  | -                                                    | 350            | -             | <i>Chem. Commun.</i> , 2011, <b>47</b> , 12137     | no         |
| Eu <sub>3</sub> (MFDA) <sub>4</sub> (NO <sub>3</sub> )(1a)                                                                                | DMF                   | -                                                    | 336            |               | <i>Dalton Trans.</i> 2013, <b>42</b> , 5718        | no         |
| [Tb(TICA)(DMA)(H <sub>2</sub> O)<br>] <sub>7</sub> ·7DMA·9.5H <sub>2</sub> O                                                              | EtOH                  | -                                                    | 370            | 0.025 mM      | <i>Chem. Commun.</i> , 2013, <b>49</b> , 11113     | no         |
| [Zn <sub>2</sub> (L)(bipy)(H <sub>2</sub> O) <sub>2</sub> ] <sub>2</sub> ·(H <sub>2</sub> O) <sub>3</sub> (DMF) <sub>2</sub> ( <b>1</b> ) | CH <sub>3</sub> CN    | -                                                    | 350            | 5–200 ppm     | <i>Dalton Trans.</i> 2013, <b>42</b> , 12865       | yes        |
| Zn-MOF ( <b>1'</b> )                                                                                                                      | -                     | -                                                    | 280            | -             | <i>J. Am.Chem. Soc.</i> , 2011, <b>133</b> , 4153  | yes        |
| <b>Co-MOFs</b>                                                                                                                            | <b>H<sub>2</sub>O</b> | <b>3.28 × 10<sup>4</sup> - 6.15 × 10<sup>4</sup></b> | <b>270 nm</b>  | <b>3.3 μM</b> | <b>This work</b>                                   | <b>yes</b> |

**Table S2** Selected bond lengths (Å) and angles (°) for MOFs **1 - 4**.

| <b>1</b>                                             |            |                                      |            |                                      |            |
|------------------------------------------------------|------------|--------------------------------------|------------|--------------------------------------|------------|
| Co1-O1                                               | 2.1062(15) | Co1-O2                               | 2.1174(15) | Co1-N3                               | 2.1244(17) |
| Co2-O3                                               | 2.1128(15) | Co2-O4                               | 2.0933(15) | Co2-N1                               | 2.1727(18) |
| O1-Co1-O1                                            | 180.00(7)  | O1-Co1-O2                            | 96.17(6)   | O1 <sup>1</sup> -Co1-O2              | 83.83(6)   |
| O1-Co1-N3                                            | 88.31(7)   | O1-Co1-N3 <sup>1</sup>               | 91.69(7)   | O2-Co1-O2                            | 180.00     |
| O2-Co1-N3                                            | 87.54(6)   | O2 <sup>1</sup> -Co1-N3              | 92.46(6)   | N3-Co1-N3                            | 180.0      |
| O3-Co2-O3                                            | 180.00     | O3-Co2-N1                            | 91.48(7)   | O3 <sup>2</sup> -Co2-N1              | 88.52(7)   |
| symmetry code: 1 = 1-x, 1-y, 1-z; 2 = 2-x, 1-y, 1-z; |            |                                      |            |                                      |            |
| <b>2</b>                                             |            |                                      |            |                                      |            |
| Co2-O3                                               | 2.109(2)   | Co2-O4                               | 2.096(2)   | Co2-N1                               | 2.171(3)   |
| Co1-O1                                               | 2.104(2)   | Co1-O2                               | 2.117(2)   | Co1-N3                               | 2.121(3)   |
| O3-Co2-O3                                            | 180.0      | O3-Co2-N1                            | 88.58(11)  | O3-Co2-N1 <sup>1</sup>               | 91.42(11)  |
| O4-Co2-O3                                            | 97.23(10)  | O4-Co2-O3 <sup>1</sup>               | 87.66(10)  | O4-Co2-O4 <sup>1</sup>               | 180.0      |
| O4-Co2-N1                                            | 91.45(11)  | O4 <sup>1</sup> -Co2-N1              | 88.55(11)  | N1-Co2-N1 <sup>1</sup>               | 180.00(16) |
| O1-Co1-O1 <sup>2</sup>                               | 180.00(11) | O1-Co1-O2 <sup>2</sup>               | 83.94(10)  | O1-Co1-O2                            | 96.06(10)  |
| O1-Co1-N3                                            | 88.30(11)  | O1 <sup>2</sup> -Co1-N3              | 91.70(11)  | O2-Co1-O2 <sup>2</sup>               | 180.00(10) |
| O2-Co1-N3 <sup>2</sup>                               | 92.36(10)  | O2-Co1-N3                            | 87.64(10)  | N3 <sup>2</sup> -Co2-N3              | 180.0      |
| symmetry code: 1 = 2-x, 1-y, 2-z; 2 = 1-x, 1-y, 2-z. |            |                                      |            |                                      |            |
| <b>3</b>                                             |            |                                      |            |                                      |            |
| Co1-O1                                               | 2.1162(12) | Co1-N1                               | 2.1409(15) | Co1-N4                               | 2.1513(15) |
| O1-Co1-O1                                            | 180.0      | O1-Co1-N1 <sup>1</sup>               | 87.18(5)   | O1-Co1-N1                            | 92.82(5)   |
| O1-Co1-N4                                            | 86.43(5)   | O1 <sup>1</sup> -Co1-N4 <sup>3</sup> | 93.56(5)   | O1 <sup>1</sup> -Co1-N4 <sup>2</sup> | 86.44(5)   |
| N1-Co1-N1 <sup>1</sup>                               | 180.00(6)  | N1-Co1-N4 <sup>3</sup>               | 90.78(6)   | N1-Co1-N4 <sup>2</sup>               | 89.22(6)   |

|                                                                               |            |                                      |           |                         |            |
|-------------------------------------------------------------------------------|------------|--------------------------------------|-----------|-------------------------|------------|
| N1 <sup>1</sup> -Co1-N4 <sup>2</sup>                                          | 90.78(6)   | N4 <sup>2</sup> -Co1-N4 <sup>3</sup> | 180.00(4) |                         |            |
| symmetry code: 1 = -x, 1-y, -z; 2 = +x, 3/2-y, 1/2+z; 3 = -x, -1/2+y, -1/2-z. |            |                                      |           |                         |            |
| <b>4</b>                                                                      |            |                                      |           |                         |            |
| Co1-O1                                                                        | 2.1086(16) | Co1-O5                               | 2.132(2)  | Co1-N1                  | 2.1002(19) |
| O1-Co1-O1 <sup>1</sup>                                                        | 180.0      | O1-Co1-O5 <sup>1</sup>               | 91.58(7)  | O1-Co1-O5               | 88.42(7)   |
| O5-Co1-O5 <sup>1</sup>                                                        | 180.0      | N1-Co1-O1                            | 88.29(8)  | N1 <sup>1</sup> -Co1-O1 | 91.71(8)   |
| N1 <sup>1</sup> -Co1-O5 <sup>1</sup>                                          | 93.24(8)   | N1 <sup>1</sup> -Co1-O5              | 86.75(8)  | N1-Co1-N1 <sup>1</sup>  | 180.0      |
| symmetry code: 1 = 1-x, -y, 1-z.                                              |            |                                      |           |                         |            |

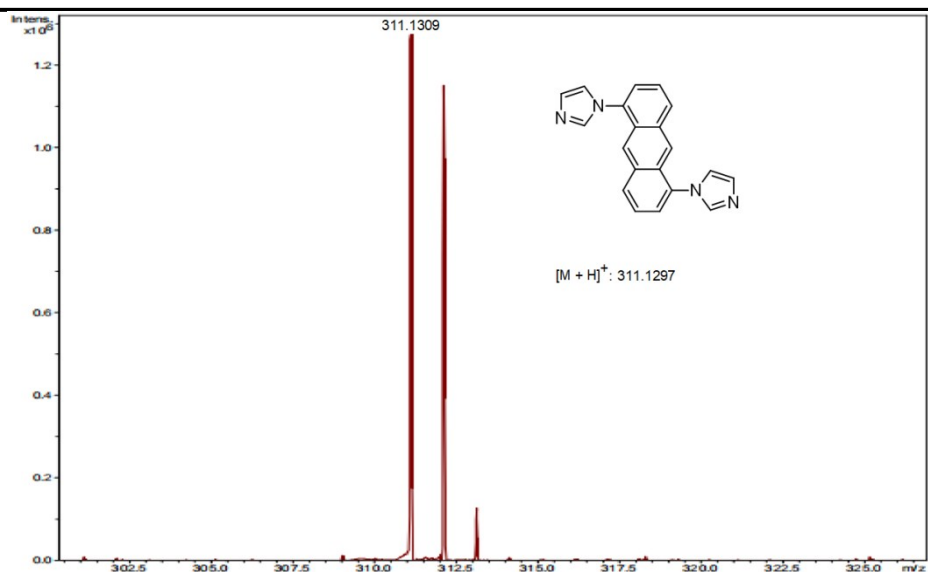

**Fig. S1** The HRMS (ESI) spectrum of **L1**

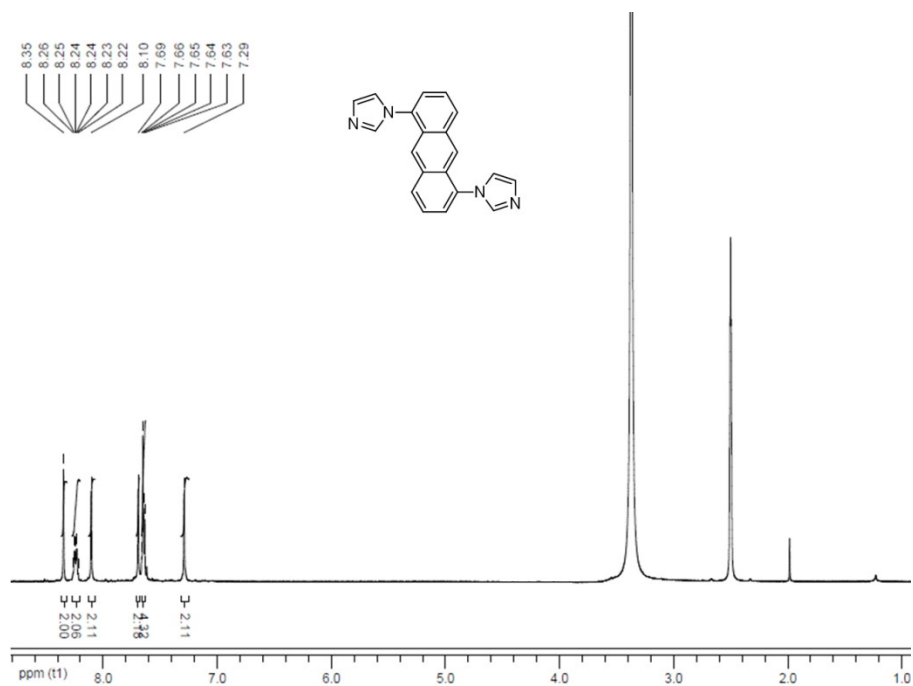

**Fig. S2** <sup>1</sup>H NMR (400 MHz) spectrum of **L1** in DMSO-d<sub>6</sub>.

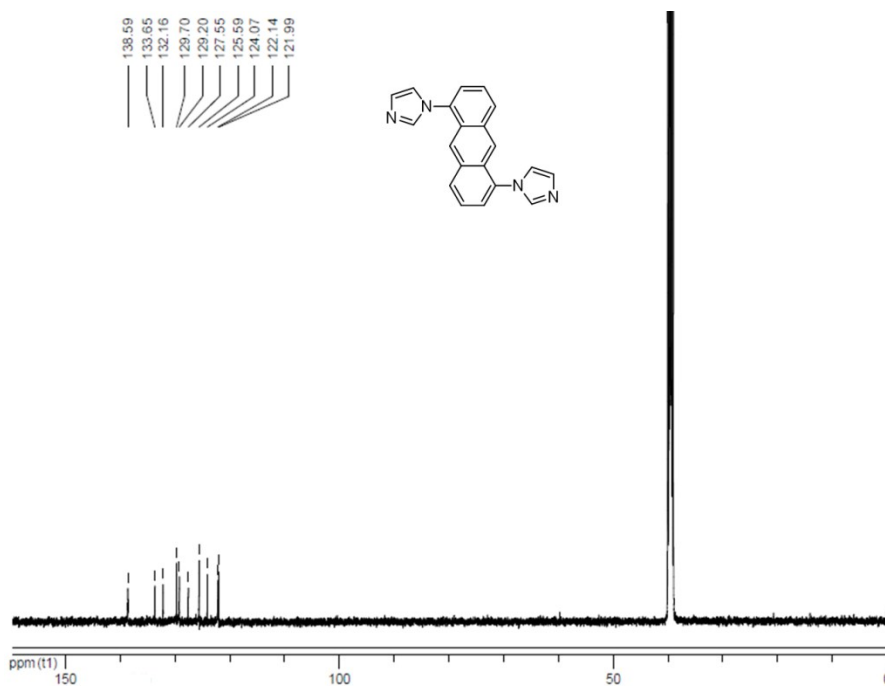

**Fig. S3**  $^{13}\text{C}$  NMR (100 MHz) spectrum of **L1** in  $\text{DMSO-d}_6$ .

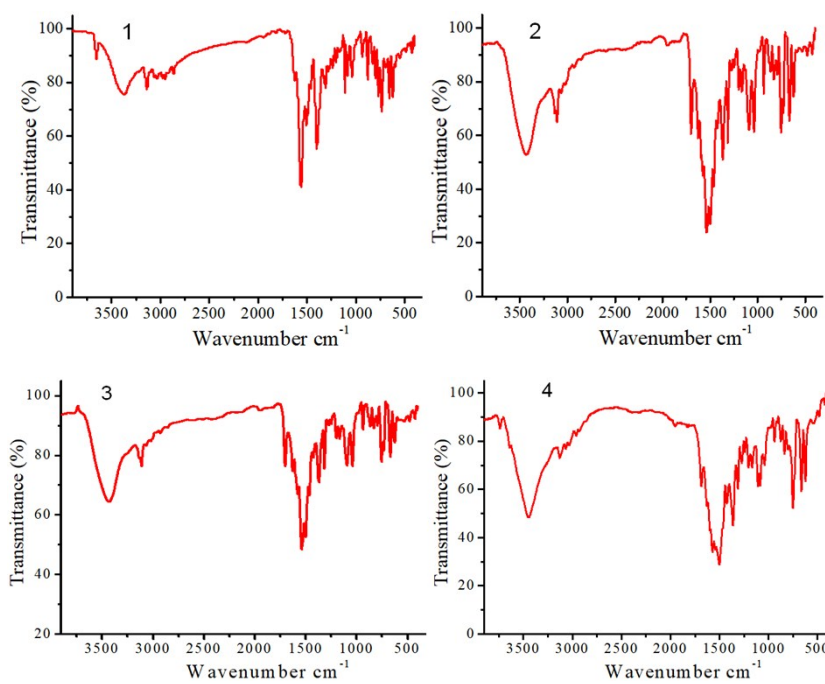

**Fig. S4** IR spectra of **1 - 4**

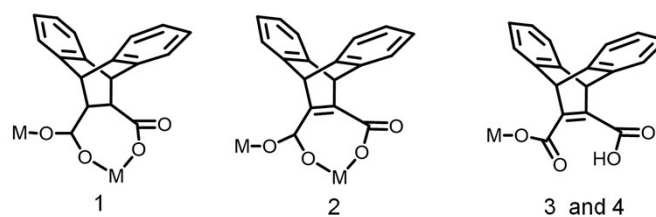

**Scheme 2** Coordination modes of dibenzobarrelene derived carboxylate ligands in MOFs **1 - 4**.

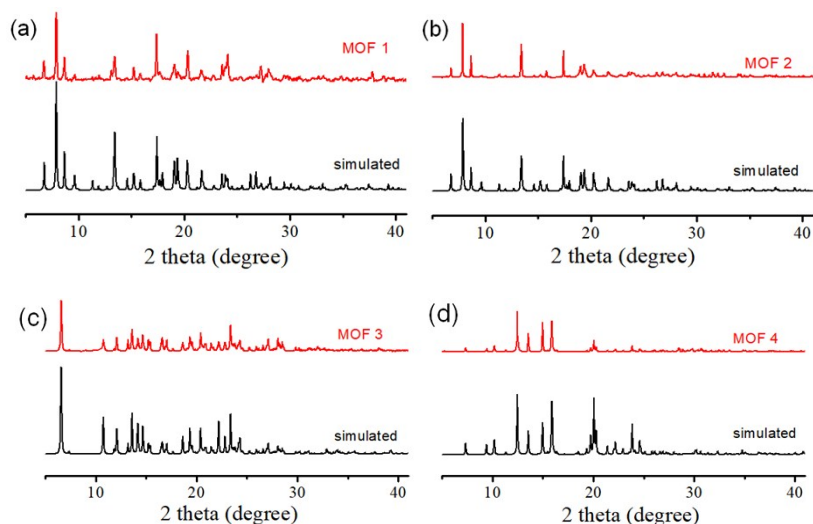

**Fig. S5** PXRD patterns of the experimental (red solid lines) and simulated samples (black solid lines), a - d for MOFs 1 - 4, respectively.

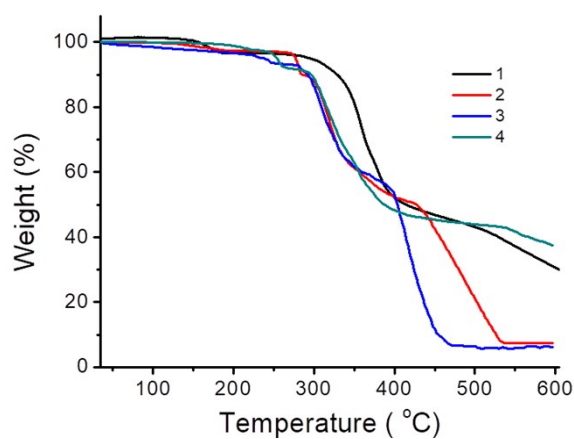

**Fig. S6** TG curves for compounds 1 - 4

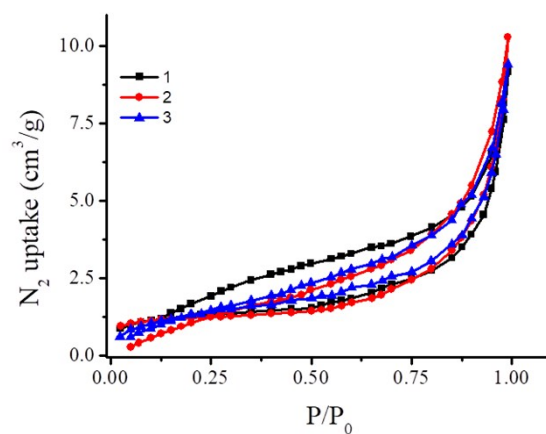

**Fig. S7** The nitrogen sorption isotherms of samples 1 - 3 at 77 K.

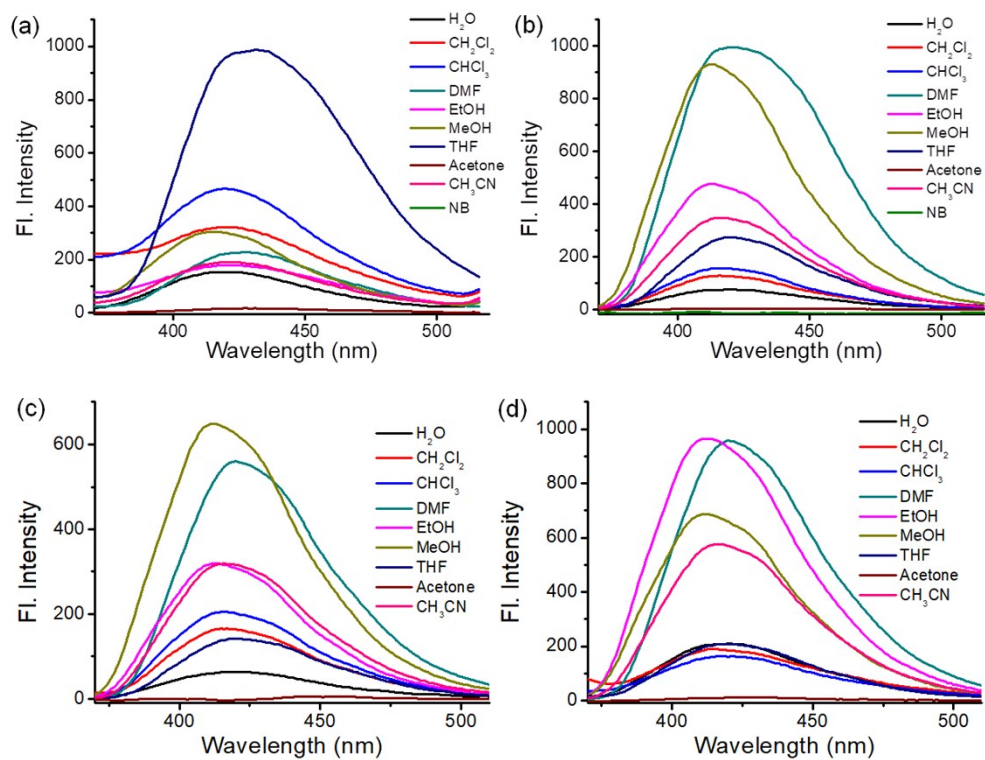

**Fig. S8** Emission profiles of MOFs in different solvents (a - d for **1 - 4**, respectively),  $\lambda_{\text{ex}}$ : 270 nm.

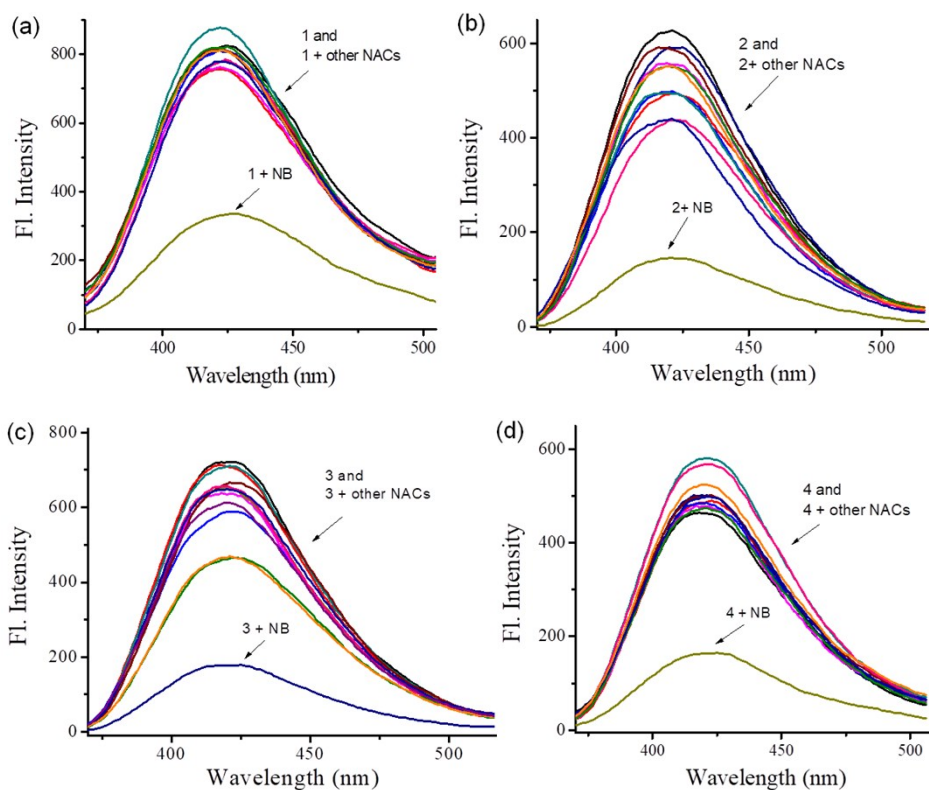

**Fig. S9** Emission profile of MOFs (0.3 mg in 3 mL water) toward various NACs (16.7  $\mu\text{M}$ ) in water, (a - d for **1 - 4**, respectively). The other NACs include 4-NP, TNP, 2-NP, 4-CNBr, 4-NTol, 2-NPA, 3-NP, 4-DNA, 4-NPA, 2, 4-NPH and 4-NBA,  $\lambda_{\text{ex}}$ : 270 nm.



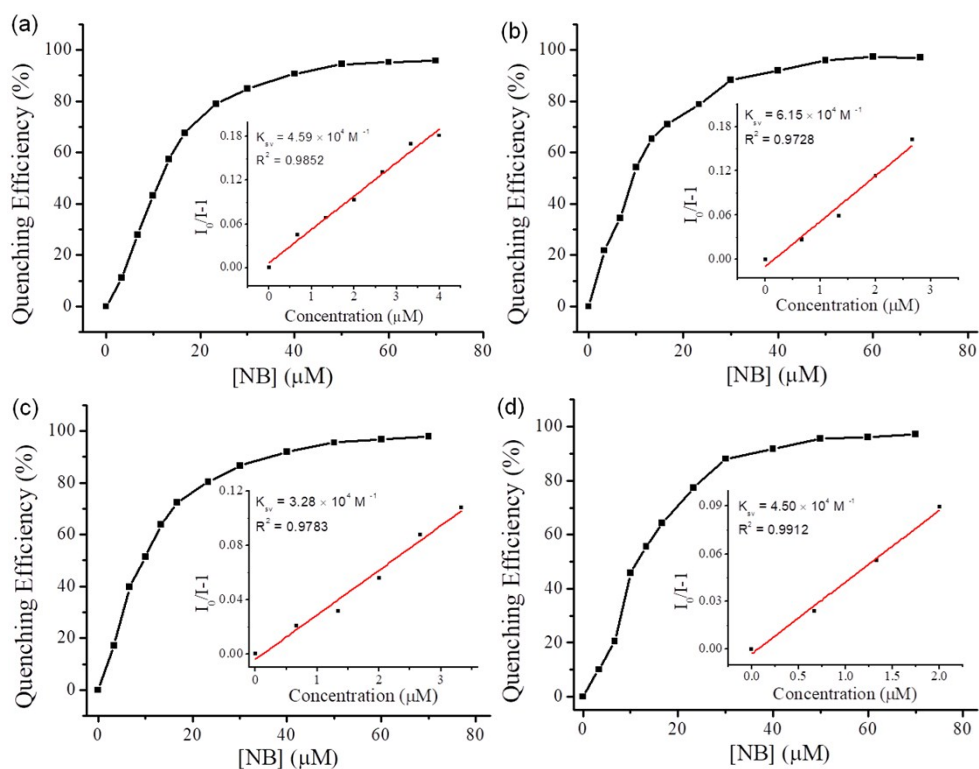

**Fig. S10** The Stern - Volmer curves of MOFs with different concentrations of NB according to the titration curves (a - d for **1 - 4**, respectively). Insets:  $K_{sv}$  values calculated from data in a - d, respectively,  $\lambda_{ex}$ : 270 nm.

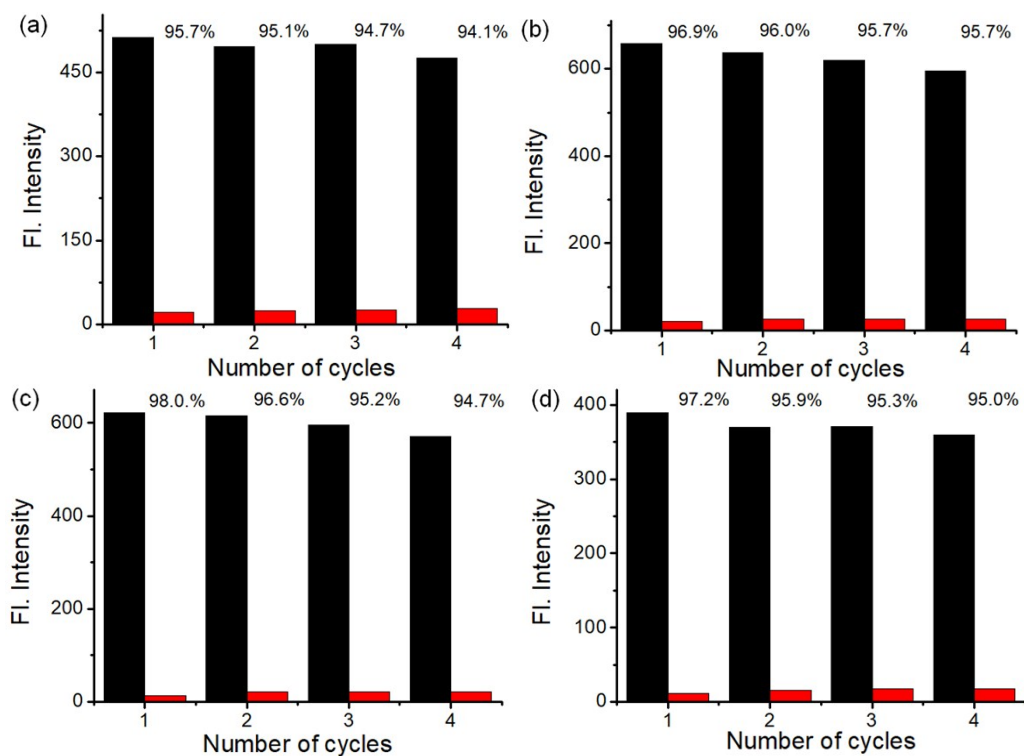

**Fig. S11** Reproducible quenching ability of MOFs (a - d for **1 - 4**, respectively) in water and in the presence of NB (70  $\mu\text{M}$ ), black bars: free MOFs; red bars: free MOFs with NB (70  $\mu\text{M}$ ), fluorescence quenching efficiencies were listed in the upper part of panels a - d, respectively.

**Table S3** OER activities of some Co-based materials and MOFs

| Catalysts                                                | $\eta$ mV@10 mA cm <sup>-2</sup>                        | Tafel Slopes | Solution                              | References                                                          |
|----------------------------------------------------------|---------------------------------------------------------|--------------|---------------------------------------|---------------------------------------------------------------------|
| <b>1</b>                                                 | <b>411</b>                                              | <b>52</b>    | <b>1M KOH</b>                         | <b>This work</b>                                                    |
| <b>2</b>                                                 | <b>406</b>                                              | <b>62</b>    |                                       |                                                                     |
| <b>3</b>                                                 | <b>438</b>                                              | <b>60</b>    |                                       |                                                                     |
| <b>4</b>                                                 | <b>398</b>                                              | <b>59</b>    |                                       |                                                                     |
| CoCo LDH                                                 | 393                                                     | 59           | 1M KOH                                | <i>Nat. Commun.</i> , 2014, <b>5</b> , 4477                         |
| NiCo LDHs                                                | 367                                                     | 40           | 1M KOH                                | <i>Nano Lett.</i> , 2015, <b>15</b> , 1421–1427.                    |
| MAF-X27-OH                                               | 387                                                     | 60           | 1M KOH                                | <i>J. Am. Chem. Soc.</i> , 2016, <b>138</b> , 8336                  |
| Co <sub>3</sub> O <sub>4</sub>                           | 465                                                     | 91           | 1M KOH                                | <i>ACS Appl. Mater. Interfaces.</i> , <b>2017</b> , <b>9</b> , 7193 |
| ZIF-67                                                   | 400                                                     | 108.8        | 1M KOH                                | <i>Adv. Funct. Mater.</i> , 2017, <b>27</b> , 1702546.              |
| Pb-MOF                                                   | 1.70 V                                                  | 106.2        | 1M KOH                                | <i>Dalton Trans.</i> , 2016, <b>45</b> , 61                         |
| [Co <sub>4</sub> (MOO <sub>4</sub> )(eim) <sub>6</sub> ] | 210@1 mA cm <sup>-2</sup><br>490@10 mA cm <sup>-2</sup> | 144/219      | 0.5 M KHCO <sub>3</sub> /<br>PBS pH=7 | <i>Angew. Chem. Int. Ed.</i> , 2019, <b>131</b> , 145               |
| Co-ZIF-9 <sup>a</sup>                                    | 400                                                     | 193          | 0.1 M PBS<br>pH = 7                   | <i>Nanoscale</i> , 2014, <b>6</b> , 9930                            |
| UTSA-16                                                  | 408                                                     | 77           | 1M KOH                                | <i>ACS Appl. Mater. Interfaces.</i> , 2017, <b>9</b> , 7193         |
| CoFe-MOF-74                                              | 280                                                     | 56           | 1M KOH                                | <i>ACS Energy Lett.</i> , 2018, <b>3</b> , 2520                     |
| A <sub>2.7</sub> B-MOF-FeCo <sub>1.6</sub>               | 288                                                     | 39           | 1M KOH                                | <i>Adv. Energy Mater.</i> , 2018, <b>8</b> , 1801564                |
| Fe/Ni <sub>2.4</sub> /Co <sub>0.4</sub> -MIL-53          | 236@20 mA cm <sup>-2</sup>                              | 52.2         | 1M KOH                                | <i>Angew. Chem. Int. Ed.</i> , 2018, <b>57</b> , 1888               |
| NiFe-UMNs                                                | 260                                                     | 30           | 1M KOH                                | <i>Nano Energy</i> , 2018, <b>44</b> , 345                          |
| CoFe-UMNs                                                | 350                                                     | 31           | 1M KOH                                |                                                                     |
| Bulk NiFe-MOFs                                           | 420                                                     | 61           | 1M KOH                                |                                                                     |
| NiCo-UMOFNs                                              | 250                                                     | 42           | 1M KOH                                | <i>Nat. Energy</i> , 2016, <b>1</b> , 16184                         |
| Ni-UMOFNs                                                | 321                                                     | 65           | 1M KOH                                |                                                                     |
| Bulk NiCo-MOFs                                           | 317                                                     | 61           | 1M KOH                                |                                                                     |

<sup>a</sup> Substrate: FTO electrode; others catalysts were loaded on glass carbon electrode (GCE).

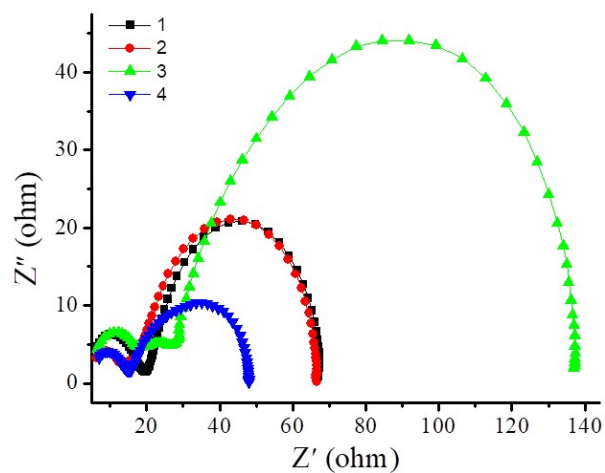

**Fig. S12** Electrochemical impedance spectra (EIS) of **1 - 4**.

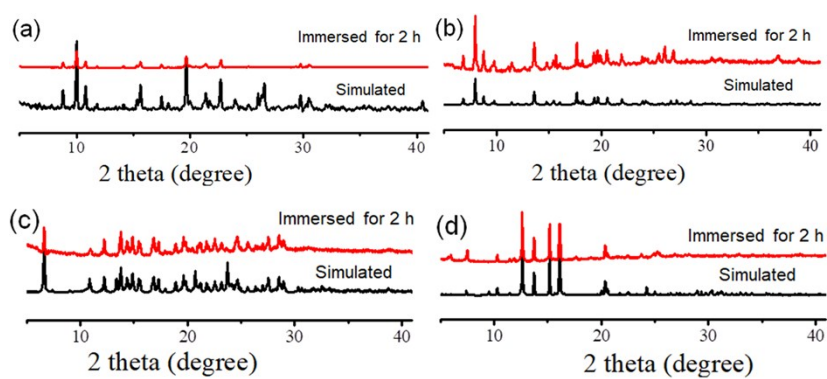

**Fig. S13** PXRD patterns of **1 - 4** immersed in 1M KOH for 2h
